# Supplementary material
Source: PubMed Central journal article supplement (PMC3017229)
Supplement: NIHMS241120-supplement-1_si_001.pdf [file NIHMS241120-supplement-1_si_001.pdf]

## SUPPORTING INFORMATION

### Stereoselective Effects of 4-Hydroxynonenal in Cultured Mouse Hepatocytes

Michael J. Dabrowski,<sup>†</sup> Joseph K. Zolnerciks,<sup>†</sup> Larissa M. Balogh,<sup>†</sup> Robert J. Greene,<sup>‡</sup> Terrance J. Kavanagh,<sup>§</sup> and William M. Atkins<sup>\*†</sup>

**Fig. S1**

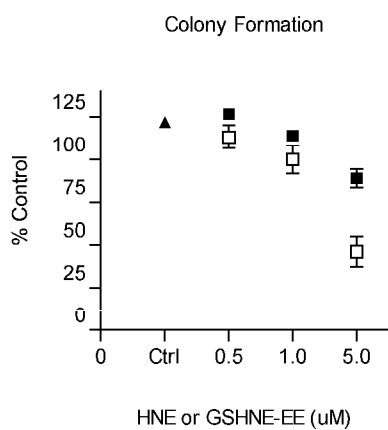

**Effects of racemic HNE and the ethyl ester of the glutathione conjugate of HNE (GSHNE-EE) on colony formation. Cells were treated as described in “Experimental Procedures” of the accompanying manuscript. Racemic HNE (open squares) and GSHNE-EE (closed squares).**
